# Supplementary material for: The Associations of Selenoprotein Genetic Variants with the Risks of Colorectal Adenoma and Colorectal Cancer: Case–Control Studies in Irish and Czech Populations
Source: MDPI journal article supplement (doi:10.3390/nu14132718), 2022-06-29
Supplement: s1 [file s1]

**Table S2:** Associations of gene variants with colorectal cancer risk in the Irish cohort.

| Gene    | SNP       | Genotype                  | Cases      | Control    | OR   | 95%CI      | P*    | FRD  |
|---------|-----------|---------------------------|------------|------------|------|------------|-------|------|
| GPX1    | rs1050450 | CC/CT/TT                  | 113/91/26  | 162/157/40 |      |            |       |      |
|         |           | Dominant (CC vs CT+TT)    | 230        | 359        | 0.85 | 0.61, 1.18 | 0.342 | 0.74 |
|         |           | Recessive (TT vs CT+CC)   | 230        | 359        | 1.11 | 0.60, 1.72 | 0.951 | 0.95 |
|         |           | Additive                  | 230        | 359        | 0.92 | 0.72, 1.18 | 0.499 | 0.74 |
| GPX3    | rs8177426 | GG/GA/AA                  | 151/84/5   | 243/113/8  |      |            |       |      |
|         |           | Dominant (GG vs GA + AA)  | 240        | 364        | 1.18 | 0.84, 1.66 | 0.332 | 0.74 |
|         |           | Recessive (AA vs GA + GG) | 240        | 364        | 0.95 | 0.31, 2.93 | 0.924 | 0.95 |
|         |           | Additive                  | 240        | 364        | 1.14 | 0.84, 1.56 | 0.394 | 0.74 |
| GPX3    | rs8177447 | CC/CT/TT                  | 155/78/5   | 247/108/8  |      |            |       |      |
|         |           | Dominant (CC vs CT+TT)    | 238        | 363        | 1.14 | 0.81, 1.61 | 0.457 | 0.74 |
|         |           | Recessive (TT vs CT+CC)   | 238        | 363        | 0.95 | 0.31, 2.95 | 0.932 | 0.95 |
|         |           | Additive                  | 238        | 363        | 1.11 | 0.81, 1.52 | 0.517 | 0.74 |
| GPX4    | rs2074451 | TT/TG/GG                  | 65/107/52  | 46/102/58  |      |            |       |      |
|         |           | Dominant (TT vs TG + GG)  | 224        | 206        | 1.08 | 0.75, 1.56 | 0.681 | 0.82 |
|         |           | Recessive (GG vs TG + GG) | 224        | 206        | 1.15 | 0.77, 1.72 | 0.493 | 0.74 |
|         |           | Additive                  | 224        | 206        | 1.08 | 0.86, 1.36 | 0.512 | 0.74 |
| GPX4    | rs713041  | CC/CT/TT                  | 68/103/54  | 108/103/73 |      |            |       |      |
|         |           | Dominant (CC vs CT+TT)    | 225        | 284        | 0.76 | 0.52, 1.13 | 0.177 | 0.68 |
|         |           | Recessive (TT vs CT+CC)   | 225        | 284        | 0.95 | 0.55, 1.64 | 0.864 | 0.95 |
|         |           | Additive                  | 225        | 284        | 0.86 | 0.65, 1.14 | 0.288 | 0.74 |
| GPX5    | rs445870  | AA/AG/GG                  | 113/104/19 | 108/79/28  |      |            |       |      |
|         |           | Dominant (AA vs AG +GG)   | 236        | 215        | 0.87 | 0.59, 1.29 | 0.489 | 0.74 |
|         |           | Recessive (GG vs AG + AA) | 236        | 215        | 2.25 | 0.69, 7.29 | 0.176 | 0.68 |
|         |           | Additive                  | 236        | 215        | 0.97 | 0.69, 1.36 | 0.870 | 0.95 |
| SELENOF | rs5859    | CC/CT/TT                  | 129/93/14  | 239/118/11 |      |            |       |      |

|                |            |                           |           |            |      |            |              |      |
|----------------|------------|---------------------------|-----------|------------|------|------------|--------------|------|
|                |            | Dominant (CC vs CT+TT)    | 236       | 368        | 1.54 | 1.10, 2.15 | <b>0.012</b> | 0.35 |
|                |            | Recessive (TT vs CT+CC)   | 236       | 368        | 2.05 | 0.91, 4.59 | 0.082        | 0.62 |
|                |            | Additive                  | 236       | 368        | 1.49 | 1.12, 1.98 | <b>0.006</b> | 0.35 |
| <b>SELENOM</b> | rs11705137 | CC/CT/TT                  | 47/125/53 | 52/111/46  |      |            |              |      |
|                |            | Dominant (CC vs CT+TT)    | 225       | 209        | 1.29 | 0.93, 1.81 | 0.123        | 0.67 |
|                |            | Recessive (TT vs CT+CC)   | 225       | 209        | 1.09 | 0.57, 2.12 | 0.789        | 0.89 |
|                |            | Additive                  | 225       | 209        | 1.19 | 0.92, 1.56 | 0.179        | 0.68 |
| <b>SELENON</b> | rs11247710 | CC/CG/GG                  | 67/104/44 | 67/104/48  |      |            |              |      |
|                |            | Dominant (CC vs CG+GG)    | 215       | 219        | 1.16 | 0.77, 1.74 | 0.476        | 0.74 |
|                |            | Recessive (GG vs CG+CC)   | 215       | 219        | 1.08 | 0.68, 1.71 | 0.749        | 0.86 |
|                |            | Additive                  | 215       | 219        | 1.09 | 0.84, 1.41 | 0.521        | 0.74 |
| <b>SELENON</b> | rs4659382  | CC/CG/GG                  | 138/84/14 | 133/76/5   |      |            |              |      |
|                |            | Dominant (CC vs CG+GG)    | 236       | 214        | 1.17 | 0.79, 1.70 | 0.427        | 0.74 |
|                |            | Recessive (GG vs CG+CC)   | 236       | 214        | 2.64 | 0.93, 7.45 | 0.067        | 0.62 |
|                |            | Additive                  | 236       | 214        | 1.25 | 0.90, 1.73 | 0.181        | 0.68 |
| <b>SELENOP</b> | rs2972994  | GG/GA/AA                  | 58/123/59 | 114/168/81 |      |            |              |      |
|                |            | Dominant (GG vs GA + AA)  | 240       | 363        | 1.44 | 0.99, 2.08 | <b>0.044</b> | 0.62 |
|                |            | Recessive (AA vs GA + GG) | 240       | 363        | 0.14 | 0.77, 1.67 | 0.518        | 0.74 |
|                |            | Additive                  | 240       | 363        | 1.20 | 0.96, 1.51 | 0.112        | 0.67 |
| <b>SELENOP</b> | rs7579     | GG/GA/AA                  | 123/93/17 | 208/136/20 |      |            |              |      |
|                |            | Dominant (GG vs GA + AA)  | 233       | 364        | 1.19 | 0.86, 1.66 | 0.297        | 0.74 |
|                |            | Recessive (AA vs GA + GG) | 233       | 364        | 1.35 | 0.69, 2.64 | 0.375        | 0.74 |
|                |            | Additive                  | 233       | 364        | 1.18 | 0.90, 1.54 | 0.231        | 0.74 |
| <b>SELENOS</b> | rs34713741 | CC/CT/TT                  | 136/77/22 | 183/159/20 |      |            |              |      |
|                |            | Dominant (CC vs CT+TT)    | 235       | 362        | 0.74 | 0.53, 1.04 | 0.080        | 0.62 |
|                |            | Recessive (TT vs CT+CC)   | 235       | 362        | 1.77 | 0.94, 3.31 | 0.076        | 0.62 |
|                |            | Additive                  | 235       | 362        | 0.91 | 0.70, 1.19 | 0.505        | 0.74 |
| <b>SEPHS1</b>  | rs2275129  | GG/GC/CC                  | 58/94/55  | 56/116/44  |      |            |              |      |

|               |            |                           |           |            |      |             |       |      |
|---------------|------------|---------------------------|-----------|------------|------|-------------|-------|------|
|               |            | Dominant (GG vs GC + CC)  | 207       | 216        | 0.89 | 0.59, 1.38  | 0.628 | 0.79 |
|               |            | Recessive (CC vs GC + GG) | 207       | 216        | 1.41 | 0.89, 2.22  | 0.133 | 0.67 |
|               |            | Additive                  | 207       | 216        | 1.09 | 0.83, 1.42  | 0.552 | 0.77 |
| <b>SOD2</b>   | rs4880     | CC/CT/TT                  | 55/122/59 | 99/174/93  |      |             |       |      |
|               |            | Dominant (CC vs CT+TT)    | 236       | 366        | 1.22 | 0.83, 1.78  | 0.304 | 0.74 |
|               |            | Recessive (TT vs CT+CC)   | 236       | 366        | 0.98 | 0.67, 1.43  | 0.910 | 0.95 |
|               |            | Additive                  | 236       | 366        | 1.07 | 0.85, 1.34  | 0.575 | 0.78 |
| <b>TXNRD1</b> | rs11111979 | GG/GC/CC                  | 68/107/65 | 67/95/52   |      |             |       |      |
|               |            | Dominant (GG vs GC + CC)  | 240       | 214        | 1.15 | 0.77, 1.73  | 0.489 | 0.74 |
|               |            | Recessive (CC vs GC + GG) | 240       | 214        | 1.16 | 0.76, 1.77  | 0.499 | 0.74 |
|               |            | Additive                  | 240       | 214        | 1.11 | 0.87, 1.42  | 0.411 | 0.74 |
| <b>TXNRD2</b> | rs9605031  | CC/CT/TT                  | 127/91/16 | 122/121/23 |      |             |       |      |
|               |            | Dominant (CC vs CT+TT)    | 234       | 266        | 1.25 | 0.80, 1.97  | 0.323 | 0.74 |
|               |            | Recessive (TT vs CT+CC)   | 234       | 266        | 1.09 | 0.69, 1.71  | 0.701 | 0.83 |
|               |            | Additive                  | 234       | 266        | 1.13 | 0.85, 1.49  | 0.394 | 0.74 |
| <b>BAX</b>    | rs4645887  | TT/TA/AA                  | 89/115/31 | 67/115/29  |      |             |       |      |
|               |            | Dominant (TT vs TA +AA)   | 235       | 211        | 0.70 | 0.45, 1.09  | 0.441 | 0.74 |
|               |            | Recessive (AA vs TA + TT) | 235       | 211        | 0.77 | 0.49, 1.19  | 0.241 | 0.74 |
|               |            | Additive                  | 235       | 211        | 0.79 | 0.61, 1.04  | 0.094 | 0.62 |
| <b>FOXO3</b>  | rs3813498  | TT/TC/CC                  | 162/70/10 | 136/73/4   |      |             |       |      |
|               |            | Dominant (TT vs TC + CC)  | 242       | 213        | 1.09 | 0.76, 1.59  | 0.618 | 0.79 |
|               |            | Recessive (CC vs TC + TT) | 242       | 213        | 0.59 | 0.32, 1.08  | 0.087 | 0.62 |
|               |            | Additive                  | 242       | 213        | 0.94 | 0.72, 1.24  | 0.677 | 0.82 |
| <b>FRZB</b>   | rs17265803 | TT/TC/CC                  | 192/55/1  | 171/43/1   |      |             |       |      |
|               |            | Dominant (TT vs TC + CC)  | 248       | 215        | 1.13 | 0.73, 1.77  | 0.581 | 0.78 |
|               |            | Recessive (CC vs TC + TT) | 248       | 215        | 0.87 | 0.05, 13.94 | 0.919 | 0.95 |
|               |            | Additive                  | 248       | 215        | 1.12 | 0.73, 1.73  | 0.604 | 0.79 |

SNP=Single Nucleotide Polymorphism; OR=Odd Ratio; CI=Confidence Interval

Case=Cancer patients; Control=Healthy individuals excluding polyp

\*p-values obtained from logistic regression model (Additive, Dominant, Recessive); **p-value considered significant at < 0.05 and noted in bold.**

FDR- False Discovery Rate obtained by the Benjamini–Hochberg procedure.
