# Supplementary material for: The Associations of Selenoprotein Genetic Variants with the Risks of Colorectal Adenoma and Colorectal Cancer: Case–Control Studies in Irish and Czech Populations
Source: MDPI journal article supplement (doi:10.3390/nu14132718), 2022-06-29
Supplement: s1 [file s1]

**Table S4:** ORs, 95% CIs, p-values, and FDR corrections for the full stratified analyses of the Czech Republic cohort.

| Gene    | SNP        | Allele | Subsite | Ca/Co   | Test      | OR   | 95%CI      | P*    | FDR  |
|---------|------------|--------|---------|---------|-----------|------|------------|-------|------|
| GPX1    | rs9818758  | G>A    | Colon   | 487/638 | Dominant  | 1.01 | 0.78, 1.31 | 0.929 | 0.99 |
|         |            |        | Colon   | 487/638 | Recessive | 0.85 | 0.42, 1.73 | 0.654 | 0.98 |
|         |            |        | Colon   | 487/638 | Additive  | 0.99 | 0.79, 1.24 | 0.948 | 0.99 |
|         |            |        | Rectal  | 231/638 | Dominant  | 1.01 | 0.73, 1.40 | 0.969 | 0.99 |
|         |            |        | Rectal  | 231/638 | Recessive | 0.70 | 0.26, 1.88 | 0.473 | 0.88 |
|         |            |        | Rectal  | 231/638 | Additive  | 0.97 | 0.73, 1.30 | 0.845 | 0.99 |
| GPX4    | rs2074451  | T>G    | Colon   | 487/638 | Dominant  | 0.91 | 0.70, 1.17 | 0.442 | 0.87 |
|         |            |        | Colon   | 487/638 | Recessive | 1.11 | 0.82, 1.52 | 0.494 | 0.88 |
|         |            |        | Colon   | 487/638 | Additive  | 0.99 | 0.83, 1.17 | 0.891 | 0.99 |
|         |            |        | Rectal  | 231/638 | Dominant  | 1.21 | 0.86, 1.70 | 0.274 | 0.87 |
|         |            |        | Rectal  | 231/638 | Recessive | 1.35 | 0.93, 1.97 | 0.115 | 0.87 |
|         |            |        | Rectal  | 231/638 | Additive  | 1.20 | 0.96, 1.50 | 0.105 | 0.87 |
| GPX5    | rs445870   | A>G    | Colon   | 487/638 | Dominant  | 0.91 | 0.71, 1.50 | 0.412 | 0.87 |
|         |            |        | Colon   | 487/638 | Recessive | 0.78 | 0.50, 1.21 | 0.266 | 0.87 |
|         |            |        | Colon   | 487/638 | Additive  | 0.90 | 0.75, 1.08 | 0.266 | 0.87 |
|         |            |        | Rectal  | 231/638 | Dominant  | 1.04 | 0.77, 1.41 | 0.818 | 0.99 |
|         |            |        | Rectal  | 231/638 | Recessive | 0.68 | 0.37, 1.25 | 0.218 | 0.87 |
|         |            |        | Rectal  | 231/638 | Additive  | 0.96 | 0.76, 1.22 | 0.727 | 0.99 |
| SELENOM | rs11705137 | T>C    | Colon   | 231/638 | Dominant  | 1.00 | 0.77, 1.29 | 0.977 | 0.99 |
|         |            |        | Colon   | 487/638 | Recessive | 0.87 | 0.65, 1.17 | 0.366 | 0.87 |
|         |            |        | Colon   | 487/638 | Additive  | 0.96 | 0.81, 1.13 | 0.592 | 0.98 |
|         |            |        | Rectal  | 231/638 | Dominant  | 0.88 | 0.64, 1.22 | 0.443 | 0.87 |
|         |            |        | Rectal  | 231/638 | Recessive | 0.76 | 0.51, 1.12 | 0.158 | 0.87 |
|         |            |        | Rectal  | 231/638 | Additive  | 0.87 | 0.70, 1.08 | 0.194 | 0.87 |
| SELENON | rs11247710 | G>C    | Colon   | 487/638 | Dominant  | 0.99 | 0.77, 1.27 | 0.922 | 0.99 |
|         |            |        | Colon   | 487/638 | Recessive | 0.97 | 0.70, 1.33 | 0.847 | 0.99 |
|         |            |        | Colon   | 487/638 | Additive  | 0.99 | 0.83, 1.17 | 0.863 | 0.99 |
|         |            |        | Rectal  | 231/638 | Dominant  | 1.16 | 1.61, 0.88 | 0.381 | 0.87 |
|         |            |        | Rectal  | 231/638 | Recessive | 0.91 | 0.60, 1.38 | 0.65  | 0.98 |
|         |            |        | Rectal  | 231/638 | Additive  | 1.04 | 0.83, 1.30 | 0.722 | 0.99 |
| SELENON | rs4659382  | C>G    | Colon   | 487/638 | Dominant  | 0.91 | 0.71, 1.16 | 0.443 | 0.87 |
|         |            |        | Colon   | 487/638 | Recessive | 0.74 | 0.41, 1.32 | 0.308 | 0.87 |
|         |            |        | Colon   | 487/638 | Additive  | 0.90 | 0.73, 1.11 | 0.313 | 0.87 |
|         |            |        | Rectal  | 231/638 | Dominant  | 1.01 | 0.74, 1.38 | 0.949 | 0.99 |
|         |            |        | Rectal  | 231/638 | Recessive | 0.97 | 0.48, 1.95 | 0.923 | 0.99 |
|         |            |        | Rectal  | 231/638 | Additive  | 1.00 | 0.77, 1.30 | 0.986 | 0.99 |
| SELENOV | rs4802034  | C>T    | Colon   | 487/638 | Dominant  | 0.97 | 0.76, 1.23 | 0.782 | 0.99 |
|         |            |        | Colon   | 487/638 | Recessive | 1.60 | 0.95, 2.70 | 0.075 | 0.87 |

|               |            |     |        |         |           |      |            |              |      |
|---------------|------------|-----|--------|---------|-----------|------|------------|--------------|------|
|               |            |     | Colon  | 487/638 | Additive  | 1.05 | 0.86, 1.28 | 0.652        | 0.98 |
|               |            |     | Rectal | 231/638 | Dominant  | 0.90 | 0.67, 1.23 | 0.517        | 0.89 |
|               |            |     | Rectal | 231/638 | Recessive | 1.42 | 0.74, 2.75 | 0.296        | 0.87 |
|               |            |     | Rectal | 231/638 | Additive  | 0.98 | 0.76, 1.27 | 0.87         | 0.99 |
| <i>SEPSH1</i> | rs2275129  | C>G | Colon  | 487/638 | Dominant  | 0.94 | 0.73, 1.21 | 0.627        | 0.98 |
|               |            |     | Colon  | 487/638 | Recessive | 1.11 | 0.82, 1.50 | 0.505        | 0.88 |
|               |            |     | Colon  | 487/638 | Additive  | 1.00 | 0.85, 1.19 | 0.96         | 0.99 |
|               |            |     | Rectal | 231/638 | Dominant  | 1.03 | 0.74, 1.44 | 0.848        | 0.99 |
|               |            |     | Rectal | 231/638 | Recessive | 1.46 | 1.01, 2.10 | <b>0.044</b> | 0.87 |
|               |            |     | Rectal | 231/638 | Additive  | 1.15 | 0.93, 1.43 | 0.202        | 0.87 |
| <i>TXNRD1</i> | rs11111979 | C>G | Colon  | 487/638 | Dominant  | 1.01 | 0.77, 1.33 | 0.917        | 0.99 |
|               |            |     | Colon  | 487/638 | Recessive | 1.20 | 0.91, 1.58 | 0.209        | 0.87 |
|               |            |     | Colon  | 487/638 | Additive  | 1.07 | 0.91, 1.26 | 0.415        | 0.87 |
|               |            |     | Rectal | 231/638 | Dominant  | 0.77 | 0.17, 0.55 | 0.122        | 0.87 |
|               |            |     | Rectal | 231/638 | Recessive | 1.10 | 0.77, 1.58 | 0.605        | 0.98 |
|               |            |     | Rectal | 231/638 | Additive  | 0.93 | 0.75, 1.15 | 0.498        | 0.88 |
| <i>TXNRD1</i> | rs7953266  | C>T | Colon  | 487/638 | Dominant  | 0.99 | 0.77, 1.27 | 0.949        | 0.99 |
|               |            |     | Colon  | 487/638 | Recessive | 1.17 | 0.86, 1.64 | 0.315        | 0.87 |
|               |            |     | Colon  | 487/638 | Additive  | 1.05 | 0.88, 1.24 | 0.613        | 0.98 |
|               |            |     | Rectal | 231/638 | Dominant  | 0.79 | 0.58, 1.08 | 0.145        | 0.87 |
|               |            |     | Rectal | 231/638 | Recessive | 1.08 | 0.72, 1.61 | 0.71         | 0.99 |
|               |            |     | Rectal | 231/638 | Additive  | 0.92 | 0.73, 1.14 | 0.425        | 0.87 |
| <i>BAX</i>    | rs4645887  | T>A | Colon  | 487/638 | Dominant  | 0.86 | 0.67, 1.10 | 0.228        | 0.87 |
|               |            |     | Colon  | 487/638 | Recessive | 1.16 | 0.84, 1.60 | 0.377        | 0.87 |
|               |            |     | Colon  | 487/638 | Additive  | 0.97 | 0.82, 1.15 | 0.716        | 0.99 |
|               |            |     | Rectal | 231/638 | Dominant  | 0.93 | 0.68, 1.28 | 0.673        | 0.99 |
|               |            |     | Rectal | 231/638 | Recessive | 1.01 | 0.67, 1.54 | 0.954        | 0.99 |
|               |            |     | Rectal | 231/638 | Additive  | 0.97 | 0.78, 1.21 | 0.791        | 0.99 |
| <i>FOXO3</i>  | rs3813498  | C>T | Colon  | 487/638 | Dominant  | 1.12 | 0.87, 1.43 | 0.39         | 0.87 |
|               |            |     | Colon  | 487/638 | Recessive | 1.08 | 0.60, 1.94 | 0.801        | 0.99 |
|               |            |     | Colon  | 487/638 | Additive  | 1.09 | 0.88, 1.34 | 0.419        | 0.87 |
|               |            |     | Rectal | 231/638 | Dominant  | 0.82 | 0.60, 1.15 | 0.252        | 0.87 |
|               |            |     | Rectal | 231/638 | Recessive | 0.75 | 0.32, 1.74 | 0.497        | 0.88 |
|               |            |     | Rectal | 231/638 | Additive  | 0.84 | 0.63, 1.12 | 0.231        | 0.87 |
| <i>FRZB</i>   | rs17265803 | T>C | Colon  | 487/638 | Dominant  | 1.17 | 0.89, 1.53 | 0.263        | 0.87 |
|               |            |     | Colon  | 487/638 | Recessive | 0.93 | 0.35, 2.45 | 0.875        | 0.99 |
|               |            |     | Colon  | 487/638 | Additive  | 1.13 | 0.88, 1.45 | 0.327        | 0.87 |
|               |            |     | Rectal | 231/638 | Dominant  | 1.20 | 0.85, 1.70 | 0.297        | 0.87 |
|               |            |     | Rectal | 231/638 | Recessive | 2.00 | 0.75, 5.31 | 0.166        | 0.87 |
|               |            |     | Rectal | 231/638 | Additive  | 1.23 | 0.15, 0.91 | 0.183        | 0.87 |

SNP, Single Nucleotide Polymorphism; OR, Odd Ratio; CI, Confidence Interval; Ca/Co, Case/Control.

The *p-value* obtained from logistic regression model (Additive, Dominant, Recessive), adjusted for age and sex; the *p*-value considered significant at  $< 0.05$  and noted in bold.

FDR- False Discovery Rate obtained by the Benjamini–Hochberg procedure.
