# Supplementary material for: The Associations of Selenoprotein Genetic Variants with the Risks of Colorectal Adenoma and Colorectal Cancer: Case–Control Studies in Irish and Czech Populations
Source: MDPI journal article supplement (doi:10.3390/nu14132718), 2022-06-29
Supplement: s1 [file s1]

**Table S3:** ORs, 95% CIs, p-values and FDR corrections for the full stratified analyses of the Irish cohorts.

| Gene        | SNP       | Allele | Ca/Co   | Case               | Control       | Test      | OR   | 95%CI      | P     | FDR  |
|-------------|-----------|--------|---------|--------------------|---------------|-----------|------|------------|-------|------|
| <b>GPX1</b> | rs1050450 | C>T    | 209/359 | Polyp/Adenoma/HGD  | Control       | Dominant  | 1.03 | 0.72, 1.45 | 0.875 | 0.99 |
|             |           |        | 209/359 | Polyp/Adenoma/HGD  | Control       | Recessive | 0.95 | 0.54, 1.65 | 0.850 | 0.99 |
|             |           |        | 209/359 | Polyp/Adenoma/HGD  | Control       | Additive  | 1.00 | 0.77, 1.29 | 0.977 | 1.00 |
|             |           |        | 230/359 | Cancer             | Control       | Dominant  | 0.85 | 0.61, 1.18 | 0.342 | 0.89 |
|             |           |        | 230/359 | Cancer             | Control       | Recessive | 1.11 | 0.60, 1.72 | 0.951 | 1.00 |
|             |           |        | 230/359 | Cancer             | Control       | Additive  | 0.92 | 0.72, 1.18 | 0.499 | 0.89 |
|             |           |        | 230/468 | Cancer             | Control/Polyp | Dominant  | 0.87 | 0.63, 1.18 | 0.368 | 0.89 |
|             |           |        | 230/468 | Cancer             | Control/Polyp | Recessive | 1.00 | 0.62, 1.64 | 0.994 | 1.00 |
|             |           |        | 230/468 | Cancer             | Control/Polyp | Additive  | 1.20 | 0.81, 1.78 | 0.503 | 0.89 |
|             |           |        | 355/468 | Adenoma/HGD/Cancer | Control/Polyp | Dominant  | 0.94 | 0.71, 1.25 | 0.689 | 0.94 |
|             |           |        | 355/468 | Adenoma/HGD/Cancer | Control/Polyp | Recessive | 0.94 | 0.59, 1.47 | 0.772 | 0.95 |
|             |           |        | 355/468 | Adenoma/HGD/Cancer | Control/Polyp | Additive  | 0.95 | 0.77, 1.18 | 0.664 | 0.94 |
|             |           |        | 355/359 | Adenoma/HGD/Cancer | Control       | Dominant  | 0.93 | 0.14, 0.70 | 0.615 | 0.92 |
|             |           |        | 355/359 | Adenoma/HGD/Cancer | Control       | Recessive | 0.98 | 0.63, 1.54 | 0.944 | 1.00 |
|             |           |        | 355/359 | Adenoma/HGD/Cancer | Control       | Additive  | 0.96 | 0.77, 1.18 | 0.684 | 0.94 |
|             |           |        | 99/359  | Adenoma/HGD        | Control       | Dominant  | 1.14 | 0.73, 1.78 | 0.562 | 0.91 |
|             |           |        | 99/359  | Adenoma/HGD        | Control       | Recessive | 0.81 | 0.38, 1.72 | 0.579 | 0.91 |
|             |           |        | 99/359  | Adenoma/HGD        | Control       | Additive  | 1.03 | 0.74, 1.44 | 0.860 | 0.99 |
|             |           |        | 99/468  | Adenoma/HGD        | Control/Polyp | Dominant  | 1.16 | 0.75, 1.80 | 0.506 | 0.89 |
|             |           |        | 99/468  | Adenoma/HGD        | Control/Polyp | Recessive | 0.79 | 0.38, 1.66 | 0.538 | 0.89 |
|             |           |        | 99/468  | Adenoma/HGD        | Control/Polyp | Additive  | 1.04 | 0.75, 1.43 | 0.835 | 0.99 |
| <b>GPX3</b> | rs8177426 | A>G    | 209/364 | Polyp/Adenoma/HGD  | Control       | Dominant  | 0.93 | 0.64, 1.34 | 0.680 | 0.94 |
|             |           |        | 209/364 | Polyp/Adenoma/HGD  | Control       | Recessive | 1.11 | 0.36, 3.43 | 0.860 | 0.99 |
|             |           |        | 209/364 | Polyp/Adenoma/HGD  | Control       | Additive  | 0.95 | 0.68, 1.32 | 0.749 | 0.94 |
|             |           |        | 240/364 | Cancer             | Control       | Dominant  | 1.18 | 0.84, 1.67 | 0.332 | 0.89 |
|             |           |        | 240/364 | Cancer             | Control       | Recessive | 0.95 | 0.31, 2.93 | 0.924 | 0.99 |
|             |           |        | 240/364 | Cancer             | Control       | Additive  | 1.14 | 0.84, 1.56 | 0.394 | 0.89 |

|             |           |     |         |                    |               |           |      |            |       |      |
|-------------|-----------|-----|---------|--------------------|---------------|-----------|------|------------|-------|------|
|             |           |     | 240/471 | Cancer             | Control/Polyp | Dominant  | 1.16 | 0.85, 1.59 | 0.379 | 0.89 |
|             |           |     | 240/471 | Cancer             | Control/Polyp | Recessive | 0.81 | 0.28, 2.34 | 0.702 | 0.94 |
|             |           |     | 240/471 | Cancer             | Control/Polyp | Additive  | 1.11 | 0.83, 1.48 | 0.497 | 0.89 |
|             |           |     | 358/471 | Adenoma/HGD/Cancer | Control/Polyp | Dominant  | 1.02 | 0.76, 1.37 | 0.891 | 0.99 |
|             |           |     | 358/471 | Adenoma/HGD/Cancer | Control/Polyp | Recessive | 0.69 | 0.26, 1.86 | 0.461 | 0.89 |
|             |           |     | 358/471 | Adenoma/HGD/Cancer | Control/Polyp | Additive  | 0.99 | 0.76, 1.29 | 0.932 | 0.99 |
|             |           |     | 358/364 | Adenoma/HGD/Cancer | Control       | Dominant  | 1.06 | 0.79, 1.42 | 0.700 | 0.94 |
|             |           |     | 358/364 | Adenoma/HGD/Cancer | Control       | Recessive | 1.02 | 0.39, 2.61 | 0.966 | 1.00 |
|             |           |     | 358/364 | Adenoma/HGD/Cancer | Control       | Additive  | 1.05 | 0.81, 1.37 | 0.719 | 0.94 |
|             |           |     | 99/364  | Adenoma/HGD        | Control       | Dominant  | 0.75 | 0.46, 1.23 | 0.260 | 0.85 |
|             |           |     | 99/364  | Adenoma/HGD        | Control       | Recessive | 0.45 | 0.06, 3.67 | 0.459 | 0.89 |
|             |           |     | 99/364  | Adenoma/HGD        | Control       | Additive  | 0.75 | 0.47, 1.19 | 0.220 | 0.83 |
|             |           |     | 99/471  | Adenoma/HGD        | Control/Polyp | Dominant  | 0.74 | 0.45, 1.19 | 0.212 | 0.83 |
|             |           |     | 99/471  | Adenoma/HGD        | Control/Polyp | Recessive | 0.39 | 0.05, 3.04 | 0.369 | 0.89 |
|             |           |     | 99/471  | Adenoma/HGD        | Control/Polyp | Additive  | 0.73 | 0.47, 1.14 | 0.166 | 0.80 |
| <b>GPX3</b> | rs8177447 | T>C | 206/363 | Polyp/Adenoma/HGD  | Control       | Dominant  | 0.97 | 0.67, 1.39 | 0.862 | 0.99 |
|             |           |     | 206/363 | Polyp/Adenoma/HGD  | Control       | Recessive | 1.09 | 0.36, 3.38 | 0.878 | 0.99 |
|             |           |     | 206/363 | Polyp/Adenoma/HGD  | Control       | Additive  | 0.98 | 0.71, 1.36 | 0.911 | 0.99 |
|             |           |     | 238/363 | Cancer             | Control       | Dominant  | 1.14 | 0.81, 1.61 | 0.457 | 0.89 |
|             |           |     | 238/363 | Cancer             | Control       | Recessive | 0.95 | 0.31, 2.94 | 0.932 | 0.99 |
|             |           |     | 238/363 | Cancer             | Control       | Additive  | 1.11 | 0.81, 1.52 | 0.517 | 0.89 |
|             |           |     | 238/472 | Cancer             | Control/Polyp | Dominant  | 1.10 | 0.79, 1.52 | 0.588 | 0.91 |
|             |           |     | 238/472 | Cancer             | Control/Polyp | Recessive | 0.82 | 0.29, 2.36 | 0.717 | 0.94 |
|             |           |     | 238/472 | Cancer             | Control/Polyp | Additive  | 1.06 | 0.79, 1.42 | 0.704 | 0.94 |
|             |           |     | 356/472 | Adenoma/HGD/Cancer | Control/Polyp | Dominant  | 0.98 | 0.73, 1.32 | 0.882 | 0.99 |
|             |           |     | 356/472 | Adenoma/HGD/Cancer | Control/Polyp | Recessive | 0.70 | 0.29, 1.87 | 0.471 | 0.89 |
|             |           |     | 356/472 | Adenoma/HGD/Cancer | Control/Polyp | Additive  | 0.96 | 0.73, 1.25 | 0.735 | 0.94 |
|             |           |     | 356/363 | Adenoma/HGD/Cancer | Control       | Dominant  | 1.06 | 0.79, 1.42 | 0.711 | 0.94 |
|             |           |     | 356/363 | Adenoma/HGD/Cancer | Control       | Recessive | 1.02 | 0.39, 2.61 | 0.971 | 1.00 |
|             |           |     | 356/363 | Adenoma/HGD/Cancer | Control       | Additive  | 1.05 | 0.80, 1.37 | 0.731 | 0.94 |

|             |           |     |         |                    |               |           |      |            |       |      |
|-------------|-----------|-----|---------|--------------------|---------------|-----------|------|------------|-------|------|
|             |           |     | 98/363  | Adenoma/HGD        | Control       | Dominant  | 0.76 | 0.46, 1.25 | 0.277 | 0.86 |
|             |           |     | 98/363  | Adenoma/HGD        | Control       | Recessive | 0.45 | 0.06, 3.67 | 0.458 | 0.89 |
|             |           |     | 98/363  | Adenoma/HGD        | Control       | Additive  | 0.76 | 0.48, 1.19 | 0.234 | 0.83 |
|             |           |     | 98/472  | Adenoma/HGD        | Control/Polyp | Dominant  | 0.73 | 0.45, 1.19 | 0.202 | 0.83 |
|             |           |     | 98/472  | Adenoma/HGD        | Control/Polyp | Recessive | 0.39 | 0.05, 3.04 | 0.370 | 0.89 |
|             |           |     | 98/472  | Adenoma/HGD        | Control/Polyp | Additive  | 0.73 | 0.46, 1.14 | 0.159 | 0.80 |
| <b>GPX4</b> | rs2074451 | T>G | 209/206 | Polyp/Adenoma/HGD  | Control       | Dominant  | 1.00 | 0.69, 1.45 | 0.995 | 1.00 |
|             |           |     | 209/206 | Polyp/Adenoma/HGD  | Control       | Recessive | 1.16 | 0.77, 1.75 | 0.477 | 0.89 |
|             |           |     | 209/206 | Polyp/Adenoma/HGD  | Control       | Additive  | 1.05 | 0.83, 1.33 | 0.688 | 0.94 |
|             |           |     | 224/206 | Cancer             | Control       | Dominant  | 1.08 | 0.75, 1.55 | 0.681 | 0.94 |
|             |           |     | 224/206 | Cancer             | Control       | Recessive | 1.15 | 0.77, 1.72 | 0.493 | 0.89 |
|             |           |     | 224/206 | Cancer             | Control       | Additive  | 1.08 | 0.86, 1.36 | 0.512 | 0.89 |
|             |           |     | 224/315 | Cancer             | Control/Polyp | Dominant  | 0.70 | 0.47, 1.03 | 0.073 | 0.72 |
|             |           |     | 224/315 | Cancer             | Control/Polyp | Recessive | 0.85 | 0.57, 1.26 | 0.408 | 0.89 |
|             |           |     | 224/315 | Cancer             | Control/Polyp | Additive  | 0.82 | 0.65, 1.05 | 0.109 | 0.80 |
|             |           |     | 355/315 | Adenoma/HGD/Cancer | Control/Polyp | Dominant  | 0.70 | 0.49, 1.01 | 0.055 | 0.70 |
|             |           |     | 355/315 | Adenoma/HGD/Cancer | Control/Polyp | Recessive | 0.91 | 0.64, 1.29 | 0.599 | 0.91 |
|             |           |     | 355/315 | Adenoma/HGD/Cancer | Control/Polyp | Additive  | 0.85 | 0.68, 1.05 | 0.130 | 0.80 |
|             |           |     | 355/206 | Adenoma/HGD/Cancer | Control       | Dominant  | 1.04 | 0.77, 1.41 | 0.803 | 0.97 |
|             |           |     | 355/206 | Adenoma/HGD/Cancer | Control       | Recessive | 1.16 | 0.82, 1.62 | 0.405 | 0.89 |
|             |           |     | 355/206 | Adenoma/HGD/Cancer | Control       | Additive  | 1.07 | 0.88, 1.29 | 0.525 | 0.89 |
|             |           |     | 98/206  | Adenoma/HGD        | Control       | Dominant  | 0.92 | 0.57, 1.48 | 0.735 | 0.94 |
|             |           |     | 98/206  | Adenoma/HGD        | Control       | Recessive | 1.32 | 0.78, 2.21 | 0.299 | 0.88 |
|             |           |     | 98/206  | Adenoma/HGD        | Control       | Additive  | 1.06 | 0.78, 1.44 | 0.706 | 0.94 |
|             |           |     | 98/315  | Adenoma/HGD        | Control/Polyp | Dominant  | 0.94 | 0.56, 1.56 | 0.814 | 0.97 |
|             |           |     | 98/315  | Adenoma/HGD        | Control/Polyp | Recessive | 1.40 | 0.84, 2.34 | 0.198 | 0.83 |
|             |           |     | 98/315  | Adenoma/HGD        | Control/Polyp | Additive  | 0.16 | 0.80, 1.53 | 0.530 | 0.89 |
| <b>GPX4</b> | rs713041  | T>C | 209/284 | Polyp/Adenoma/HGD  | Control       | Dominant  | 0.68 | 0.45, 1.01 | 0.059 | 0.71 |
|             |           |     | 209/284 | Polyp/Adenoma/HGD  | Control       | Recessive | 1.13 | 0.65, 1.94 | 0.674 | 0.94 |
|             |           |     | 209/284 | Polyp/Adenoma/HGD  | Control       | Additive  | 0.85 | 0.64, 1.13 | 0.261 | 0.85 |

|             |          |     |         |                    |               |           |      |            |       |      |
|-------------|----------|-----|---------|--------------------|---------------|-----------|------|------------|-------|------|
|             |          |     | 225/284 | Cancer             | Control       | Dominant  | 0.76 | 0.52, 1.13 | 0.177 | 0.80 |
|             |          |     | 225/284 | Cancer             | Control       | Recessive | 0.95 | 0.55, 1.64 | 0.864 | 0.99 |
|             |          |     | 225/284 | Cancer             | Control       | Additive  | 0.86 | 0.65, 1.14 | 0.288 | 0.87 |
|             |          |     | 225/448 | Cancer             | Control/Polyp | Dominant  | 1.06 | 0.75, 1.50 | 0.741 | 0.94 |
|             |          |     | 225/448 | Cancer             | Control/Polyp | Recessive | 1.14 | 0.78, 1.67 | 0.491 | 0.89 |
|             |          |     | 225/448 | Cancer             | Control/Polyp | Additive  | 1.07 | 0.86, 1.34 | 0.544 | 0.89 |
|             |          |     | 355/448 | Adenoma/HGD/Cancer | Control/Polyp | Dominant  | 1.01 | 0.74, 1.37 | 0.952 | 1.00 |
|             |          |     | 355/448 | Adenoma/HGD/Cancer | Control/Polyp | Recessive | 1.19 | 0.85, 1.67 | 0.310 | 0.89 |
|             |          |     | 355/448 | Adenoma/HGD/Cancer | Control/Polyp | Additive  | 1.06 | 0.87, 1.29 | 0.530 | 0.89 |
|             |          |     | 355/284 | Adenoma/HGD/Cancer | Control       | Dominant  | 0.72 | 0.51, 1.02 | 0.066 | 0.72 |
|             |          |     | 355/284 | Adenoma/HGD/Cancer | Control       | Recessive | 1.03 | 0.64, 1.66 | 0.896 | 0.99 |
|             |          |     | 355/284 | Adenoma/HGD/Cancer | Control       | Additive  | 0.86 | 0.67, 1.09 | 0.213 | 0.83 |
|             |          |     | 98/284  | Adenoma/HGD        | Control       | Dominant  | 0.71 | 0.48, 1.17 | 0.181 | 0.80 |
|             |          |     | 98/284  | Adenoma/HGD        | Control       | Recessive | 0.81 | 0.39, 1.70 | 0.582 | 0.91 |
|             |          |     | 98/284  | Adenoma/HGD        | Control       | Additive  | 0.79 | 0.54, 1.14 | 0.210 | 0.83 |
|             |          |     | 98/448  | Adenoma/HGD        | Control/Polyp | Dominant  | 0.91 | 0.57, 1.44 | 0.672 | 0.94 |
|             |          |     | 98/448  | Adenoma/HGD        | Control/Polyp | Recessive | 1.31 | 0.79, 2.16 | 0.296 | 0.88 |
|             |          |     | 98/448  | Adenoma/HGD        | Control/Polyp | Additive  | 1.05 | 0.78, 1.41 | 0.740 | 0.94 |
| <b>GPX5</b> | rs445870 | A>G | 209/215 | Polyp/Adenoma/HGD  | Control       | Dominant  | 0.92 | 0.61, 1.37 | 0.668 | 0.94 |
|             |          |     | 209/215 | Polyp/Adenoma/HGD  | Control       | Recessive | 2.12 | 0.63, 7.16 | 0.225 | 0.83 |
|             |          |     | 209/215 | Polyp/Adenoma/HGD  | Control       | Additive  | 1.00 | 0.70, 1.43 | 0.997 | 1.00 |
|             |          |     | 236/215 | Cancer             | Control       | Dominant  | 0.87 | 0.59, 1.29 | 0.489 | 0.89 |
|             |          |     | 236/215 | Cancer             | Control       | Recessive | 2.25 | 0.69, 7.29 | 0.176 | 0.80 |
|             |          |     | 236/215 | Cancer             | Control       | Additive  | 0.97 | 0.69, 1.36 | 0.870 | 0.99 |
|             |          |     | 236/324 | Cancer             | Control/Polyp | Dominant  | 1.19 | 0.85, 1.66 | 0.317 | 0.89 |
|             |          |     | 236/324 | Cancer             | Control/Polyp | Recessive | 0.66 | 0.37, 1.18 | 0.158 | 0.80 |
|             |          |     | 236/324 | Cancer             | Control/Polyp | Additive  | 1.01 | 0.79, 1.30 | 0.916 | 0.99 |
|             |          |     | 355/324 | Adenoma/HGD/Cancer | Control/Polyp | Dominant  | 1.12 | 0.83, 1.53 | 0.456 | 0.89 |
|             |          |     | 355/324 | Adenoma/HGD/Cancer | Control/Polyp | Recessive | 0.69 | 0.41, 1.16 | 0.159 | 0.80 |
|             |          |     | 355/324 | Adenoma/HGD/Cancer | Control/Polyp | Additive  | 0.99 | 0.79, 1.25 | 0.937 | 1.00 |

|                |        |     |         |                    |               |           |      |            |              |      |
|----------------|--------|-----|---------|--------------------|---------------|-----------|------|------------|--------------|------|
|                |        |     | 355/215 | Adenoma/HGD/Cancer | Control       | Dominant  | 0.89 | 0.63, 1.26 | 0.512        | 0.89 |
|                |        |     | 355/215 | Adenoma/HGD/Cancer | Control       | Recessive | 2.19 | 0.73, 6.56 | 0.160        | 0.80 |
|                |        |     | 355/215 | Adenoma/HGD/Cancer | Control       | Additive  | 0.99 | 0.73, 1.33 | 0.923        | 0.99 |
|                |        |     | 98/215  | Adenoma/HGD        | Control       | Dominant  | 1.11 | 0.68, 1.82 | 0.687        | 0.94 |
|                |        |     | 98/215  | Adenoma/HGD        | Control       | Recessive | 2.27 | 0.56, 9.28 | 0.253        | 0.85 |
|                |        |     | 98/215  | Adenoma/HGD        | Control       | Additive  | 1.17 | 0.76, 1.82 | 0.481        | 0.89 |
|                |        |     | 98/324  | Adenoma/HGD        | Control/Polyp | Dominant  | 0.98 | 0.62, 1.55 | 0.943        | 1.00 |
|                |        |     | 98/324  | Adenoma/HGD        | Control/Polyp | Recessive | 0.77 | 0.36, 1.65 | 0.503        | 0.89 |
|                |        |     | 98/324  | Adenoma/HGD        | Control/Polyp | Additive  | 0.94 | 0.67, 1.31 | 0.716        | 0.94 |
| <i>SELENOF</i> | rs5859 | C>T | 209/368 | Polyp/Adenoma/HGD  | Control       | Dominant  | 1.29 | 0.91, 1.83 | 0.153        | 0.80 |
|                |        |     | 209/368 | Polyp/Adenoma/HGD  | Control       | Recessive | 0.82 | 0.78, 4.28 | 0.169        | 0.80 |
|                |        |     | 209/368 | Polyp/Adenoma/HGD  | Control       | Additive  | 1.29 | 0.96, 1.74 | 0.090        | 0.75 |
|                |        |     | 236/368 | Cancer             | Control       | Dominant  | 1.54 | 1.10, 2.15 | <b>0.012</b> | 0.50 |
|                |        |     | 236/368 | Cancer             | Control       | Recessive | 2.05 | 0.91, 4.59 | 0.082        | 0.75 |
|                |        |     | 236/368 | Cancer             | Control       | Additive  | 1.49 | 1.12, 1.98 | <b>0.006</b> | 0.50 |
|                |        |     | 236/477 | Cancer             | Control/Polyp | Dominant  | 1.47 | 1.07, 2.02 | <b>0.017</b> | 0.50 |
|                |        |     | 236/477 | Cancer             | Control/Polyp | Recessive | 1.82 | 0.87, 3.80 | 0.111        | 0.80 |
|                |        |     | 236/477 | Cancer             | Control/Polyp | Additive  | 1.42 | 1.09, 1.86 | <b>0.010</b> | 0.50 |
|                |        |     | 334/477 | Adenoma/HGD/Cancer | Control/Polyp | Dominant  | 1.43 | 1.07, 1.90 | <b>0.014</b> | 0.50 |
|                |        |     | 334/477 | Adenoma/HGD/Cancer | Control/Polyp | Recessive | 1.84 | 0.94, 3.59 | <b>0.008</b> | 0.50 |
|                |        |     | 334/477 | Adenoma/HGD/Cancer | Control/Polyp | Additive  | 1.39 | 1.10, 1.77 | <b>0.007</b> | 0.50 |
|                |        |     | 334/368 | Adenoma/HGD/Cancer | Control       | Dominant  | 1.42 | 1.07, 1.88 | <b>0.016</b> | 0.50 |
|                |        |     | 334/368 | Adenoma/HGD/Cancer | Control       | Recessive | 1.94 | 0.37, 0.95 | 0.072        | 0.72 |
|                |        |     | 334/368 | Adenoma/HGD/Cancer | Control       | Additive  | 1.39 | 1.09, 1.78 | <b>0.008</b> | 0.50 |
|                |        |     | 99/368  | Adenoma/HGD        | Control       | Dominant  | 1.39 | 0.88, 2.19 | 0.155        | 0.80 |
|                |        |     | 99/368  | Adenoma/HGD        | Control       | Recessive | 2.12 | 0.76, 5.87 | 0.150        | 0.80 |
|                |        |     | 99/368  | Adenoma/HGD        | Control       | Additive  | 1.40 | 0.95, 2.04 | 0.087        | 0.75 |
|                |        |     | 99/477  | Adenoma/HGD        | Control/Polyp | Dominant  | 1.33 | 0.86, 2.06 | 0.206        | 0.83 |
|                |        |     | 99/477  | Adenoma/HGD        | Control/Polyp | Recessive | 1.88 | 0.72, 4.93 | 0.200        | 0.83 |
|                |        |     | 99/477  | Adenoma/HGD        | Control/Polyp | Additive  | 1.33 | 0.92, 1.93 | 0.127        | 0.80 |

|                |            |     |         |                    |               |           |      |            |       |      |
|----------------|------------|-----|---------|--------------------|---------------|-----------|------|------------|-------|------|
| <b>SELENOM</b> | rs11705137 | T>C | 209/209 | Polyp/Adenoma/HGD  | Control       | Dominant  | 1.31 | 0.93, 1.85 | 0.127 | 0.80 |
|                |            |     | 209/209 | Polyp/Adenoma/HGD  | Control       | Recessive | 1.25 | 0.64, 2.42 | 0.510 | 0.89 |
|                |            |     | 209/209 | Polyp/Adenoma/HGD  | Control       | Additive  | 1.23 | 0.94, 1.61 | 0.140 | 0.80 |
|                |            |     | 225/209 | Cancer             | Control       | Dominant  | 1.30 | 0.93, 1.81 | 0.123 | 0.80 |
|                |            |     | 225/209 | Cancer             | Control       | Recessive | 1.10 | 0.57, 2.12 | 0.789 | 0.95 |
|                |            |     | 225/209 | Cancer             | Control       | Additive  | 1.20 | 0.92, 1.56 | 0.179 | 0.80 |
|                |            |     | 225/316 | Cancer             | Control/Polyp | Dominant  | 1.33 | 0.88, 1.99 | 0.174 | 0.80 |
|                |            |     | 225/316 | Cancer             | Control/Polyp | Recessive | 0.99 | 0.66, 1.48 | 0.962 | 1.00 |
|                |            |     | 225/316 | Cancer             | Control/Polyp | Additive  | 1.11 | 0.87, 1.42 | 0.417 | 0.89 |
|                |            |     | 352/316 | Adenoma/HGD/Cancer | Control/Polyp | Dominant  | 1.13 | 0.79, 1.62 | 0.507 | 0.89 |
|                |            |     | 352/316 | Adenoma/HGD/Cancer | Control/Polyp | Recessive | 1.10 | 0.77, 1.58 | 0.596 | 0.91 |
|                |            |     | 352/316 | Adenoma/HGD/Cancer | Control/Polyp | Additive  | 1.09 | 0.87, 1.36 | 0.460 | 0.89 |
|                |            |     | 352/209 | Adenoma/HGD/Cancer | Control       | Dominant  | 1.30 | 0.98, 1.73 | 0.065 | 0.72 |
|                |            |     | 352/209 | Adenoma/HGD/Cancer | Control       | Recessive | 1.17 | 0.67, 2.03 | 0.586 | 0.91 |
|                |            |     | 352/209 | Adenoma/HGD/Cancer | Control       | Additive  | 1.21 | 0.97, 1.52 | 0.091 | 0.75 |
|                |            |     | 99/209  | Adenoma/HGD        | Control       | Dominant  | 0.99 | 0.63, 1.57 | 0.976 | 1.00 |
|                |            |     | 99/209  | Adenoma/HGD        | Control       | Recessive | 1.16 | 0.48, 2.79 | 0.740 | 0.94 |
|                |            |     | 99/209  | Adenoma/HGD        | Control       | Additive  | 1.02 | 0.71, 1.47 | 0.913 | 0.99 |
|                |            |     | 99/316  | Adenoma/HGD        | Control/Polyp | Dominant  | 0.81 | 0.49, 1.34 | 0.411 | 0.89 |
|                |            |     | 99/316  | Adenoma/HGD        | Control/Polyp | Recessive | 1.39 | 0.84, 2.31 | 0.202 | 0.83 |
|                |            |     | 99/316  | Adenoma/HGD        | Control/Polyp | Additive  | 1.04 | 0.76, 1.43 | 0.790 | 0.95 |
| <b>SELENON</b> | rs11247710 | G>C | 209/219 | Polyp/Adenoma/HGD  | Control       | Dominant  | 1.07 | 0.71, 1.61 | 0.753 | 0.94 |
|                |            |     | 209/219 | Polyp/Adenoma/HGD  | Control       | Recessive | 1.09 | 0.68, 1.74 | 0.727 | 0.94 |
|                |            |     | 209/219 | Polyp/Adenoma/HGD  | Control       | Additive  | 1.06 | 0.81, 1.37 | 0.690 | 0.94 |
|                |            |     | 215/219 | Cancer             | Control       | Dominant  | 1.16 | 0.77, 1.74 | 0.476 | 0.89 |
|                |            |     | 215/219 | Cancer             | Control       | Recessive | 1.08 | 0.68, 1.71 | 0.749 | 0.94 |
|                |            |     | 215/219 | Cancer             | Control       | Additive  | 1.09 | 0.84, 1.41 | 0.521 | 0.89 |
|                |            |     | 215/320 | Cancer             | Control/Polyp | Dominant  | 1.19 | 0.82, 1.72 | 0.359 | 0.89 |
|                |            |     | 215/320 | Cancer             | Control/Polyp | Recessive | 1.12 | 0.74, 1.71 | 0.590 | 0.91 |
|                |            |     | 215/320 | Cancer             | Control/Polyp | Additive  | 0.92 | 0.73, 1.17 | 0.369 | 0.89 |

|                |           |     |         |                    |               |           |      |             |              |      |
|----------------|-----------|-----|---------|--------------------|---------------|-----------|------|-------------|--------------|------|
|                |           |     | 356/320 | Adenoma/HGD/Cancer | Control/Polyp | Dominant  | 1.22 | 0.87, 1.73  | 0.245        | 0.84 |
|                |           |     | 356/320 | Adenoma/HGD/Cancer | Control/Polyp | Recessive | 1.20 | 0.82, 1.76  | 0.342        | 0.89 |
|                |           |     | 356/320 | Adenoma/HGD/Cancer | Control/Polyp | Additive  | 1.15 | 0.93, 1.43  | 0.190        | 0.82 |
|                |           |     | 356/219 | Adenoma/HGD/Cancer | Control       | Dominant  | 1.11 | 0.78, 1.58  | 0.548        | 0.90 |
|                |           |     | 356/219 | Adenoma/HGD/Cancer | Control       | Recessive | 1.08 | 0.72, 1.62  | 0.701        | 0.94 |
|                |           |     | 356/219 | Adenoma/HGD/Cancer | Control       | Additive  | 1.07 | 0.86, 1.35  | 0.545        | 0.89 |
|                |           |     | 99/219  | Adenoma/HGD        | Control       | Dominant  | 1.26 | 0.75, 2.12  | 0.389        | 0.89 |
|                |           |     | 99/219  | Adenoma/HGD        | Control       | Recessive | 1.33 | 0.76, 2.34  | 0.316        | 0.89 |
|                |           |     | 99/219  | Adenoma/HGD        | Control       | Additive  | 1.21 | 0.87, 1.68  | 0.263        | 0.85 |
|                |           |     | 99/320  | Adenoma/HGD        | Control/Polyp | Dominant  | 1.29 | 0.79, 2.12  | 0.313        | 0.89 |
|                |           |     | 99/320  | Adenoma/HGD        | Control/Polyp | Additive  | 1.24 | 0.91, 1.65  | 0.182        | 0.80 |
| <b>SELENON</b> | rs4659382 | C>G | 206/214 | Polyp/Adenoma/HGD  | Control       | Dominant  | 1.43 | 0.97, 2.11  | 0.070        | 0.72 |
|                |           |     | 206/214 | Polyp/Adenoma/HGD  | Control       | Recessive | 3.52 | 1.27, 9.79  | <b>0.016</b> | 0.50 |
|                |           |     | 206/214 | Polyp/Adenoma/HGD  | Control       | Additive  | 1.51 | 1.08, 2.07  | <b>0.015</b> | 0.50 |
|                |           |     | 236/214 | Cancer             | Control       | Dominant  | 1.17 | 0.79, 1.70  | 0.427        | 0.89 |
|                |           |     | 236/214 | Cancer             | Control       | Recessive | 2.64 | 0.93, 7.45  | 0.067        | 0.72 |
|                |           |     | 236/214 | Cancer             | Control       | Additive  | 1.25 | 0.90, 1.73  | 0.181        | 0.80 |
|                |           |     | 236/323 | Cancer             | Control/Polyp | Dominant  | 1.07 | 0.76, 1.50  | 0.706        | 0.94 |
|                |           |     | 236/323 | Cancer             | Control/Polyp | Recessive | 1.39 | 0.65, 2.98  | 0.394        | 0.89 |
|                |           |     | 236/323 | Cancer             | Control/Polyp | Additive  | 1.10 | 0.83, 1.45  | 0.529        | 0.89 |
|                |           |     | 333/323 | Adenoma/HGD/Cancer | Control/Polyp | Dominant  | 1.17 | 0.86, 1.60  | 0.311        | 0.89 |
|                |           |     | 333/323 | Adenoma/HGD/Cancer | Control/Polyp | Recessive | 1.49 | 0.74, 2.98  | 0.264        | 0.85 |
|                |           |     | 333/323 | Adenoma/HGD/Cancer | Control/Polyp | Additive  | 1.18 | 0.91, 1.53  | 0.207        | 0.83 |
|                |           |     | 333/214 | Adenoma/HGD/Cancer | Control       | Dominant  | 1.28 | 0.92, 1.79  | 0.142        | 0.80 |
|                |           |     | 333/214 | Adenoma/HGD/Cancer | Control       | Recessive | 3.04 | 1.16, 7.96  | <b>0.023</b> | 0.57 |
|                |           |     | 333/214 | Adenoma/HGD/Cancer | Control       | Additive  | 1.36 | 1.02, 1.80  | <b>0.035</b> | 0.68 |
|                |           |     | 97/214  | Adenoma/HGD        | Control       | Dominant  | 1.61 | 0.99, 2.61  | 0.055        | 0.70 |
|                |           |     | 97/214  | Adenoma/HGD        | Control       | Recessive | 3.25 | 1.01, 10.52 | <b>0.049</b> | 0.69 |
|                |           |     | 97/214  | Adenoma/HGD        | Control       | Additive  | 1.64 | 1.09, 2.48  | <b>0.019</b> | 0.50 |
|                |           |     | 97/323  | Adenoma/HGD        | Control/Polyp | Dominant  | 1.47 | 0.94, 2.32  | 0.096        | 0.75 |

|                |           |     |         |                    |               |           |      |            |              |      |
|----------------|-----------|-----|---------|--------------------|---------------|-----------|------|------------|--------------|------|
|                |           |     | 97/323  | Adenoma/HGD        | Control/Polyp | Recessive | 1.72 | 0.48, 0.67 | 0.258        | 0.85 |
|                |           |     | 97/323  | Adenoma/HGD        | Control/Polyp | Additive  | 1.41 | 0.97, 2.04 | 0.071        | 0.72 |
| <b>SELENOP</b> | rs2972994 | G>A | 208/363 | Polyp/Adenoma/HGD  | Control       | Dominant  | 1.10 | 0.75, 1.59 | 0.630        | 0.92 |
|                |           |     | 208/363 | Polyp/Adenoma/HGD  | Control       | Recessive | 1.08 | 0.72, 1.62 | 0.710        | 0.94 |
|                |           |     | 208/363 | Polyp/Adenoma/HGD  | Control       | Additive  | 1.06 | 0.84, 1.35 | 0.603        | 0.91 |
|                |           |     | 240/363 | Cancer             | Control       | Dominant  | 1.44 | 0.99, 2.08 | 0.055        | 0.70 |
|                |           |     | 240/363 | Cancer             | Control       | Recessive | 0.14 | 0.77, 1.67 | 0.518        | 0.89 |
|                |           |     | 240/363 | Cancer             | Control       | Additive  | 1.20 | 0.96, 1.51 | 0.112        | 0.80 |
|                |           |     | 240/471 | Cancer             | Control/Polyp | Dominant  | 1.44 | 1.01, 2.05 | <b>0.044</b> | 0.69 |
|                |           |     | 240/471 | Cancer             | Control/Polyp | Recessive | 1.18 | 0.82, 1.70 | 0.378        | 0.89 |
|                |           |     | 240/471 | Cancer             | Control/Polyp | Additive  | 1.22 | 0.98, 1.52 | 0.073        | 0.72 |
|                |           |     | 308/471 | Adenoma/HGD/Cancer | Control/Polyp | Dominant  | 1.37 | 1.00, 1.87 | <b>0.049</b> | 0.69 |
|                |           |     | 308/471 | Adenoma/HGD/Cancer | Control/Polyp | Recessive | 1.25 | 0.89, 1.73 | 0.184        | 0.80 |
|                |           |     | 308/471 | Adenoma/HGD/Cancer | Control/Polyp | Additive  | 1.22 | 1.01, 1.49 | <b>0.044</b> | 0.69 |
|                |           |     | 308/363 | Adenoma/HGD/Cancer | Control       | Dominant  | 1.26 | 0.93, 1.71 | 0.135        | 0.80 |
|                |           |     | 308/363 | Adenoma/HGD/Cancer | Control       | Recessive | 1.11 | 0.79, 1.54 | 0.537        | 0.89 |
|                |           |     | 308/363 | Adenoma/HGD/Cancer | Control       | Additive  | 0.14 | 0.93, 1.38 | 0.193        | 0.82 |
|                |           |     | 98/363  | Adenoma/HGD        | Control       | Dominant  | 1.22 | 0.74, 2.00 | 0.429        | 0.89 |
|                |           |     | 98/363  | Adenoma/HGD        | Control       | Recessive | 1.37 | 0.83, 2.27 | 0.216        | 0.83 |
|                |           |     | 98/363  | Adenoma/HGD        | Control       | Additive  | 1.21 | 0.89, 1.64 | 0.225        | 0.83 |
|                |           |     | 98/471  | Adenoma/HGD        | Control/Polyp | Dominant  | 1.22 | 0.76, 1.98 | 0.416        | 0.89 |
|                |           |     | 98/471  | Adenoma/HGD        | Control/Polyp | Recessive | 1.43 | 0.88, 2.33 | 0.155        | 0.80 |
|                |           |     | 98/471  | Adenoma/HGD        | Control/Polyp | Additive  | 1.23 | 0.59, 1.21 | 0.180        | 0.80 |
| <b>SELENOP</b> | rs7579    | T>C | 209/364 | Polyp/Adenoma/HGD  | Control       | Dominant  | 1.18 | 0.83, 1.66 | 0.355        | 0.89 |
|                |           |     | 209/364 | Polyp/Adenoma/HGD  | Control       | Recessive | 1.74 | 0.90, 3.34 | 0.097        | 0.75 |
|                |           |     | 209/364 | Polyp/Adenoma/HGD  | Control       | Additive  | 1.22 | 0.93, 1.59 | 0.156        | 0.80 |
|                |           |     | 233/364 | Cancer             | Control       | Dominant  | 1.19 | 0.86, 1.66 | 0.297        | 0.88 |
|                |           |     | 233/364 | Cancer             | Control       | Recessive | 1.35 | 0.69, 2.64 | 0.375        | 0.89 |
|                |           |     | 233/364 | Cancer             | Control       | Additive  | 1.18 | 0.90, 1.54 | 0.231        | 0.83 |
|                |           |     | 233/473 | Cancer             | Control/Polyp | Dominant  | 1.08 | 0.79, 1.48 | 0.622        | 0.92 |



|                |            |     |         |                    |               |           |      |            |              |      |
|----------------|------------|-----|---------|--------------------|---------------|-----------|------|------------|--------------|------|
|                |            |     | 233/473 | Cancer             | Control/Polyp | Recessive | 1.05 | 0.57, 1.93 | 0.876        | 0.99 |
|                |            |     | 233/473 | Cancer             | Control/Polyp | Additive  | 1.06 | 0.83, 1.36 | 0.648        | 0.94 |
|                |            |     | 356/473 | Adenoma/HGD/Cancer | Control/Polyp | Dominant  | 0.99 | 0.75, 1.31 | 0.949        | 1.00 |
|                |            |     | 356/473 | Adenoma/HGD/Cancer | Control/Polyp | Recessive | 1.00 | 0.57, 1.73 | 0.988        | 1.00 |
|                |            |     | 356/473 | Adenoma/HGD/Cancer | Control/Polyp | Additive  | 0.99 | 0.79, 1.24 | 0.954        | 1.00 |
|                |            |     | 356/364 | Adenoma/HGD/Cancer | Control       | Dominant  | 1.19 | 0.89, 1.57 | 0.235        | 0.83 |
|                |            |     | 356/364 | Adenoma/HGD/Cancer | Control       | Recessive | 1.53 | 0.87, 2.69 | 0.139        | 0.80 |
|                |            |     | 356/364 | Adenoma/HGD/Cancer | Control       | Additive  | 1.20 | 0.96, 1.49 | 0.120        | 0.80 |
|                |            |     | 99/364  | Adenoma/HGD        | Control       | Dominant  | 0.88 | 0.56, 1.39 | 0.586        | 0.91 |
|                |            |     | 99/364  | Adenoma/HGD        | Control       | Recessive | 1.12 | 0.44, 2.87 | 0.811        | 0.97 |
|                |            |     | 99/364  | Adenoma/HGD        | Control       | Additive  | 0.93 | 0.64, 1.34 | 0.722        | 0.94 |
|                |            |     | 99/473  | Adenoma/HGD        | Control/Polyp | Dominant  | 0.80 | 0.51, 1.25 | 0.324        | 0.89 |
|                |            |     | 99/473  | Adenoma/HGD        | Control/Polyp | Recessive | 0.87 | 0.35, 2.14 | 0.760        | 0.94 |
|                |            |     | 99/473  | Adenoma/HGD        | Control/Polyp | Additive  | 0.85 | 0.59, 1.21 | 0.361        | 0.89 |
| <b>SELENOS</b> | rs34713741 | C>T | 209/362 | Polyp/Adenoma/HGD  | Control       | Dominant  | 0.85 | 0.60, 1.19 | 0.350        | 0.89 |
|                |            |     | 209/362 | Polyp/Adenoma/HGD  | Control       | Recessive | 1.25 | 0.62, 2.54 | 0.530        | 0.89 |
|                |            |     | 209/362 | Polyp/Adenoma/HGD  | Control       | Additive  | 0.93 | 0.69, 1.23 | 0.601        | 0.91 |
|                |            |     | 235/362 | Cancer             | Control       | Dominant  | 0.74 | 0.53, 1.04 | 0.080        | 0.75 |
|                |            |     | 235/362 | Cancer             | Control       | Recessive | 1.77 | 0.94, 3.31 | 0.076        | 0.73 |
|                |            |     | 235/362 | Cancer             | Control       | Additive  | 0.91 | 0.70, 1.19 | 0.505        | 0.89 |
|                |            |     | 235/472 | Cancer             | Control/Polyp | Dominant  | 0.73 | 0.53, 0.99 | <b>0.049</b> | 0.69 |
|                |            |     | 235/472 | Cancer             | Control/Polyp | Recessive | 1.58 | 0.88, 2.81 | 0.122        | 0.80 |
|                |            |     | 235/472 | Cancer             | Control/Polyp | Additive  | 0.89 | 0.69, 1.14 | 0.352        | 0.89 |
|                |            |     | 365/472 | Adenoma/HGD/Cancer | Control/Polyp | Dominant  | 0.69 | 0.52, 0.92 | <b>0.011</b> | 0.50 |
|                |            |     | 365/472 | Adenoma/HGD/Cancer | Control/Polyp | Recessive | 1.36 | 0.79, 2.35 | 0.267        | 0.85 |
|                |            |     | 365/472 | Adenoma/HGD/Cancer | Control/Polyp | Additive  | 0.83 | 0.66, 1.05 | 0.110        | 0.80 |
|                |            |     | 365/362 | Adenoma/HGD/Cancer | Control       | Dominant  | 0.79 | 0.59, 1.05 | 0.101        | 0.77 |
|                |            |     | 365/362 | Adenoma/HGD/Cancer | Control       | Recessive | 1.52 | 0.87, 2.68 | 0.144        | 0.80 |
|                |            |     | 365/362 | Adenoma/HGD/Cancer | Control       | Additive  | 0.92 | 0.74, 1.15 | 0.476        | 0.89 |
|                |            |     | 95/362  | Adenoma/HGD        | Control       | Dominant  | 0.62 | 0.39, 0.99 | <b>0.046</b> | 0.69 |

|               |           |     |         |                    |               |           |      |            |              |      |
|---------------|-----------|-----|---------|--------------------|---------------|-----------|------|------------|--------------|------|
|               |           |     | 95/362  | Adenoma/HGD        | Control       | Recessive | 0.95 | 0.35, 2.60 | 0.921        | 0.99 |
|               |           |     | 95/362  | Adenoma/HGD        | Control       | Additive  | 0.71 | 0.48, 1.05 | 0.088        | 0.75 |
|               |           |     | 95/472  | Adenoma/HGD        | Control/Polyp | Dominant  | 0.61 | 0.39, 0.94 | <b>0.032</b> | 0.68 |
|               |           |     | 95/472  | Adenoma/HGD        | Control/Polyp | Recessive | 0.85 | 0.32, 2.25 | 0.742        | 0.94 |
|               |           |     | 95/472  | Adenoma/HGD        | Control/Polyp | Additive  | 0.69 | 0.47, 1.01 | 0.058        | 0.71 |
| <i>SEPSH1</i> | rs2275129 | C>G | 201/216 | Polyp/Adenoma/HGD  | Control       | Dominant  | 1.03 | 0.66, 1.59 | 0.897        | 0.99 |
|               |           |     | 201/216 | Polyp/Adenoma/HGD  | Control       | Recessive | 1.62 | 1.03, 2.55 | <b>0.034</b> | 0.68 |
|               |           |     | 201/216 | Polyp/Adenoma/HGD  | Control       | Additive  | 1.21 | 0.92, 1.59 | 0.171        | 0.80 |
|               |           |     | 207/216 | Cancer             | Control       | Dominant  | 0.90 | 0.58, 1.38 | 0.628        | 0.92 |
|               |           |     | 207/216 | Cancer             | Control       | Recessive | 1.41 | 0.89, 2.22 | 0.133        | 0.80 |
|               |           |     | 207/216 | Cancer             | Control       | Additive  | 1.09 | 0.82, 1.42 | 0.552        | 0.90 |
|               |           |     | 207/323 | Cancer             | Control/Polyp | Dominant  | 0.95 | 0.64, 1.39 | 0.785        | 0.95 |
|               |           |     | 207/323 | Cancer             | Control/Polyp | Recessive | 1.28 | 0.86, 1.93 | 0.227        | 0.83 |
|               |           |     | 207/323 | Cancer             | Control/Polyp | Additive  | 1.07 | 0.84, 1.37 | 0.582        | 0.91 |
|               |           |     | 301/323 | Adenoma/HGD/Cancer | Control/Polyp | Dominant  | 1.05 | 0.74, 1.51 | 0.773        | 0.95 |
|               |           |     | 301/323 | Adenoma/HGD/Cancer | Control/Polyp | Recessive | 1.44 | 1.01, 2.07 | <b>0.047</b> | 0.69 |
|               |           |     | 301/323 | Adenoma/HGD/Cancer | Control/Polyp | Additive  | 1.17 | 0.94, 1.45 | 0.160        | 0.80 |
|               |           |     | 301/216 | Adenoma/HGD/Cancer | Control       | Dominant  | 0.96 | 0.66, 1.39 | 0.832        | 0.99 |
|               |           |     | 301/216 | Adenoma/HGD/Cancer | Control       | Recessive | 1.52 | 1.02, 2.25 | <b>0.039</b> | 0.69 |
|               |           |     | 301/216 | Adenoma/HGD/Cancer | Control       | Additive  | 1.14 | 0.91, 1.44 | 0.263        | 0.85 |
|               |           |     | 94/216  | Adenoma/HGD        | Control       | Dominant  | 1.30 | 0.73, 2.31 | 0.383        | 0.89 |
|               |           |     | 94/216  | Adenoma/HGD        | Control       | Recessive | 2.02 | 1.18, 3.46 | <b>0.011</b> | 0.50 |
|               |           |     | 94/216  | Adenoma/HGD        | Control       | Additive  | 1.46 | 1.03, 2.08 | <b>0.035</b> | 0.68 |
|               |           |     | 94/323  | Adenoma/HGD        | Control/Polyp | Dominant  | 1.36 | 0.79, 2.37 | 0.270        | 0.85 |
|               |           |     | 94/323  | Adenoma/HGD        | Control/Polyp | Recessive | 1.83 | 1.11, 3.02 | <b>0.018</b> | 0.50 |
|               |           |     | 94/323  | Adenoma/HGD        | Control/Polyp | Additive  | 1.43 | 1.03, 1.98 | <b>0.034</b> | 0.68 |
| <i>SOD2</i>   | rs4880    | T>C | 209/366 | Polyp/Adenoma/HGD  | Control       | Dominant  | 1.06 | 0.72, 1.57 | 0.752        | 0.94 |
|               |           |     | 209/366 | Polyp/Adenoma/HGD  | Control       | Recessive | 0.90 | 0.60, 1.34 | 0.599        | 0.91 |
|               |           |     | 209/366 | Polyp/Adenoma/HGD  | Control       | Additive  | 0.99 | 0.78, 1.25 | 0.904        | 0.99 |
|               |           |     | 236/366 | Cancer             | Control       | Dominant  | 1.22 | 0.84, 1.78 | 0.304        | 0.89 |

|        |            |     |         |                    |               |           |      |            |       |      |
|--------|------------|-----|---------|--------------------|---------------|-----------|------|------------|-------|------|
|        |            |     | 236/366 | Cancer             | Control       | Recessive | 0.98 | 0.67, 1.43 | 0.910 | 0.99 |
|        |            |     | 236/366 | Cancer             | Control       | Additive  | 1.07 | 0.85, 1.34 | 0.575 | 0.91 |
|        |            |     | 236/476 | Cancer             | Control/Polyp | Recessive | 0.99 | 0.69, 1.42 | 0.952 | 1.00 |
|        |            |     | 236/476 | Cancer             | Control/Polyp | Additive  | 1.06 | 0.85, 1.32 | 0.602 | 0.91 |
|        |            |     | 355/476 | Adenoma/HGD/Cancer | Control/Polyp | Dominant  | 1.11 | 0.80, 1.53 | 0.522 | 0.89 |
|        |            |     | 355/476 | Adenoma/HGD/Cancer | Control/Polyp | Recessive | 0.95 | 0.68, 1.31 | 0.738 | 0.94 |
|        |            |     | 355/476 | Adenoma/HGD/Cancer | Control/Polyp | Additive  | 1.02 | 0.84, 1.24 | 0.849 | 0.99 |
|        |            |     | 355/366 | Adenoma/HGD/Cancer | Control       | Dominant  | 1.14 | 0.83, 1.57 | 0.407 | 0.89 |
|        |            |     | 355/366 | Adenoma/HGD/Cancer | Control       | Recessive | 0.94 | 0.68, 1.29 | 0.708 | 0.94 |
|        |            |     | 355/366 | Adenoma/HGD/Cancer | Control       | Additive  | 1.03 | 0.85, 1.25 | 0.778 | 0.95 |
|        |            |     | 99/366  | Adenoma/HGD        | Control       | Dominant  | 0.99 | 0.60, 1.63 | 0.965 | 1.00 |
|        |            |     | 99/366  | Adenoma/HGD        | Control       | Recessive | 0.84 | 0.49, 1.42 | 0.515 | 0.89 |
|        |            |     | 99/366  | Adenoma/HGD        | Control       | Additive  | 0.94 | 0.69, 1.28 | 0.676 | 0.94 |
|        |            |     | 99/476  | Adenoma/HGD        | Control/Polyp | Dominant  | 0.96 | 0.58, 1.56 | 0.870 | 0.99 |
|        |            |     | 99/476  | Adenoma/HGD        | Control/Polyp | Recessive | 0.85 | 0.51, 1.42 | 0.531 | 0.89 |
|        |            |     | 99/476  | Adenoma/HGD        | Control/Polyp | Additive  | 0.93 | 0.69, 1.26 | 0.631 | 0.92 |
| TXNRD1 | rs11111979 | C>G | 209/214 | Polyp/Adenoma/HGD  | Control       | Dominant  | 1.13 | 0.74, 1.71 | 0.573 | 0.91 |
|        |            |     | 209/214 | Polyp/Adenoma/HGD  | Control       | Recessive | 0.98 | 0.63, 1.53 | 0.924 | 0.99 |
|        |            |     | 209/214 | Polyp/Adenoma/HGD  | Control       | Additive  | 1.04 | 0.80, 1.35 | 0.766 | 0.95 |
|        |            |     | 240/214 | Cancer             | Control       | Dominant  | 1.15 | 0.77, 1.73 | 0.489 | 0.89 |
|        |            |     | 240/214 | Cancer             | Control       | Recessive | 1.16 | 0.76, 1.77 | 0.499 | 0.89 |
|        |            |     | 240/214 | Cancer             | Control       | Additive  | 1.11 | 0.87, 1.42 | 0.411 | 0.89 |
|        |            |     | 240/323 | Cancer             | Control/Polyp | Dominant  | 1.05 | 0.73, 1.52 | 0.780 | 0.95 |
|        |            |     | 240/323 | Cancer             | Control/Polyp | Recessive | 1.19 | 0.81, 1.74 | 0.381 | 0.89 |
|        |            |     | 240/323 | Cancer             | Control/Polyp | Additive  | 1.08 | 0.86, 1.36 | 0.490 | 0.89 |
|        |            |     | 355/323 | Adenoma/HGD/Cancer | Control/Polyp | Dominant  | 1.00 | 0.71, 1.39 | 0.988 | 1.00 |
|        |            |     | 355/323 | Adenoma/HGD/Cancer | Control/Polyp | Recessive | 1.15 | 0.81, 1.64 | 0.434 | 0.89 |
|        |            |     | 355/323 | Adenoma/HGD/Cancer | Control/Polyp | Additive  | 1.05 | 0.86, 1.29 | 0.650 | 0.94 |
|        |            |     | 355/214 | Adenoma/HGD/Cancer | Control       | Dominant  | 1.14 | 0.80, 1.63 | 0.465 | 0.89 |
|        |            |     | 355/214 | Adenoma/HGD/Cancer | Control       | Recessive | 1.07 | 0.73, 1.57 | 0.715 | 0.94 |

|        |           |     |         |                    |               |           |      |            |       |      |
|--------|-----------|-----|---------|--------------------|---------------|-----------|------|------------|-------|------|
|        |           |     | 355/214 | Adenoma/HGD/Cancer | Control       | Additive  | 1.08 | 0.86, 1.35 | 0.506 | 0.89 |
|        |           |     | 96/214  | Adenoma/HGD        | Control       | Dominant  | 0.96 | 0.57, 1.60 | 0.863 | 0.99 |
|        |           |     | 96/214  | Adenoma/HGD        | Control       | Recessive | 1.04 | 0.59, 1.81 | 0.895 | 0.99 |
|        |           |     | 96/214  | Adenoma/HGD        | Control       | Additive  | 1.00 | 0.72, 1.37 | 0.975 | 1.00 |
|        |           |     | 96/323  | Adenoma/HGD        | Control/Polyp | Dominant  | 0.87 | 0.54, 1.43 | 0.589 | 0.91 |
|        |           |     | 96/323  | Adenoma/HGD        | Control/Polyp | Recessive | 1.07 | 0.63, 1.81 | 0.815 | 0.97 |
|        |           |     | 96/323  | Adenoma/HGD        | Control/Polyp | Additive  | 0.97 | 0.71, 1.32 | 0.840 | 0.99 |
| TXNRD2 | rs9605031 | C>T | 208/266 | Polyp/Adenoma/HGD  | Control       | Dominant  | 0.81 | 0.52, 1.25 | 0.339 | 0.89 |
|        |           |     | 208/266 | Polyp/Adenoma/HGD  | Control       | Recessive | 1.42 | 0.91, 2.22 | 0.126 | 0.80 |
|        |           |     | 208/266 | Polyp/Adenoma/HGD  | Control       | Additive  | 1.05 | 0.80, 1.37 | 0.738 | 0.94 |
|        |           |     | 234/266 | Cancer             | Control       | Dominant  | 1.25 | 0.81, 1.97 | 0.323 | 0.89 |
|        |           |     | 234/266 | Cancer             | Control       | Recessive | 1.09 | 0.69, 1.71 | 0.701 | 0.94 |
|        |           |     | 234/266 | Cancer             | Control       | Additive  | 1.13 | 0.85, 1.49 | 0.394 | 0.89 |
|        |           |     | 256/476 | Cancer             | Control/Polyp | Dominant  | 1.15 | 0.84, 1.58 | 0.377 | 0.89 |
|        |           |     | 256/476 | Cancer             | Control/Polyp | Recessive | 1.08 | 0.55, 1.89 | 0.954 | 1.00 |
|        |           |     | 256/476 | Cancer             | Control/Polyp | Additive  | 1.10 | 0.85, 1.41 | 0.466 | 0.89 |
|        |           |     | 355/476 | Adenoma/HGD/Cancer | Control/Polyp | Dominant  | 1.07 | 0.80, 1.42 | 0.656 | 0.94 |
|        |           |     | 355/476 | Adenoma/HGD/Cancer | Control/Polyp | Recessive | 1.04 | 0.59, 1.81 | 0.900 | 0.99 |
|        |           |     | 355/476 | Adenoma/HGD/Cancer | Control/Polyp | Additive  | 1.05 | 0.84, 1.31 | 0.680 | 0.94 |
|        |           |     | 355/266 | Adenoma/HGD/Cancer | Control       | Dominant  | 1.01 | 0.69, 1.48 | 0.975 | 1.00 |
|        |           |     | 355/266 | Adenoma/HGD/Cancer | Control       | Recessive | 1.24 | 0.84, 1.84 | 0.281 | 0.86 |
|        |           |     | 355/266 | Adenoma/HGD/Cancer | Control       | Additive  | 1.09 | 0.86, 1.37 | 0.496 | 0.89 |
|        |           |     | 97/266  | Adenoma/HGD        | Control       | Dominant  | 0.77 | 0.45, 1.31 | 0.329 | 0.89 |
|        |           |     | 97/266  | Adenoma/HGD        | Control       | Recessive | 1.53 | 0.89, 2.65 | 0.124 | 0.80 |
|        |           |     | 97/266  | Adenoma/HGD        | Control       | Additive  | 1.06 | 0.75, 1.48 | 0.745 | 0.94 |
|        |           |     | 97/476  | Adenoma/HGD        | Control/Polyp | Dominant  | 0.88 | 0.56, 1.38 | 0.579 | 0.91 |
|        |           |     | 97/476  | Adenoma/HGD        | Control/Polyp | Recessive | 1.08 | 0.43, 0.47 | 0.860 | 0.99 |
|        |           |     | 97/476  | Adenoma/HGD        | Control/Polyp | Additive  | 0.94 | 0.67, 1.34 | 0.710 | 0.94 |
| BAX    | rs4645887 | T>A | 209/211 | Polyp/Adenoma/HGD  | Control       | Dominant  | 1.17 | 1.81, 0.69 | 0.486 | 0.89 |
|        |           |     | 209/211 | Polyp/Adenoma/HGD  | Control       | Recessive | 1.17 | 0.74, 1.84 | 0.505 | 0.89 |

|       |           |     |         |                    |               |           |      |            |              |      |
|-------|-----------|-----|---------|--------------------|---------------|-----------|------|------------|--------------|------|
|       |           |     | 209/211 | Polyp/Adenoma/HGD  | Control       | Additive  | 1.12 | 0.86, 1.48 | 0.404        | 0.89 |
|       |           |     | 235/211 | Cancer             | Control       | Dominant  | 0.70 | 0.45, 1.09 | 0.441        | 0.89 |
|       |           |     | 235/211 | Cancer             | Control       | Recessive | 0.77 | 0.49, 1.19 | 0.241        | 0.83 |
|       |           |     | 235/211 | Cancer             | Control       | Additive  | 0.80 | 0.61, 1.04 | 0.094        | 0.75 |
|       |           |     | 235/319 | Cancer             | Control/Polyp | Dominant  | 0.89 | 0.63, 1.26 | 0.504        | 0.89 |
|       |           |     | 235/319 | Cancer             | Control/Polyp | Recessive | 0.84 | 0.52, 1.36 | 0.473        | 0.89 |
|       |           |     | 235/319 | Cancer             | Control/Polyp | Additive  | 0.90 | 0.69, 1.15 | 0.398        | 0.89 |
|       |           |     | 355/319 | Adenoma/HGD/Cancer | Control/Polyp | Dominant  | 0.87 | 0.64, 1.19 | 0.389        | 0.89 |
|       |           |     | 355/319 | Adenoma/HGD/Cancer | Control/Polyp | Recessive | 0.80 | 0.51, 1.25 | 0.927        | 0.99 |
|       |           |     | 355/319 | Adenoma/HGD/Cancer | Control/Polyp | Additive  | 0.88 | 0.69, 1.10 | 0.260        | 0.85 |
|       |           |     | 355/211 | Adenoma/HGD/Cancer | Control       | Dominant  | 0.77 | 0.52, 1.14 | 0.193        | 0.82 |
|       |           |     | 355/211 | Adenoma/HGD/Cancer | Control       | Recessive | 0.81 | 0.55, 1.18 | 0.276        | 0.86 |
|       |           |     | 355/211 | Adenoma/HGD/Cancer | Control       | Additive  | 0.12 | 0.67, 1.06 | 0.144        | 0.80 |
|       |           |     | 98/211  | Adenoma/HGD        | Control       | Dominant  | 1.03 | 0.60, 1.76 | 0.913        | 0.99 |
|       |           |     | 98/211  | Adenoma/HGD        | Control       | Recessive | 1.39 | 0.81, 2.41 | 0.237        | 0.83 |
|       |           |     | 98/211  | Adenoma/HGD        | Control       | Additive  | 1.14 | 0.82, 1.59 | 0.440        | 0.89 |
|       |           |     | 98/319  | Adenoma/HGD        | Control/Polyp | Dominant  | 0.83 | 0.52, 1.32 | 0.424        | 0.89 |
|       |           |     | 98/319  | Adenoma/HGD        | Control/Polyp | Recessive | 0.71 | 0.35, 1.43 | 0.342        | 0.89 |
|       |           |     | 98/319  | Adenoma/HGD        | Control/Polyp | Additive  | 0.83 | 0.59, 1.17 | 0.280        | 0.86 |
| FOXO3 | rs3813498 | C>T | 209/213 | Polyp/Adenoma/HGD  | Control       | Dominant  | 0.85 | 0.58, 1.24 | 0.396        | 0.89 |
|       |           |     | 209/213 | Polyp/Adenoma/HGD  | Control       | Recessive | 0.68 | 0.36, 1.25 | 0.218        | 0.83 |
|       |           |     | 209/213 | Polyp/Adenoma/HGD  | Control       | Additive  | 0.84 | 0.64, 1.12 | 0.233        | 0.83 |
|       |           |     | 242/213 | Cancer             | Control       | Dominant  | 1.10 | 0.76, 1.59 | 0.618        | 0.92 |
|       |           |     | 242/213 | Cancer             | Control       | Recessive | 0.59 | 0.32, 1.08 | 0.087        | 0.75 |
|       |           |     | 242/213 | Cancer             | Control       | Additive  | 0.94 | 0.72, 1.24 | 0.677        | 0.94 |
|       |           |     | 256/322 | Cancer             | Control/Polyp | Dominant  | 0.95 | 0.67, 1.36 | 0.784        | 0.95 |
|       |           |     | 256/322 | Cancer             | Control/Polyp | Recessive | 1.69 | 1.14, 3.01 | 0.276        | 0.86 |
|       |           |     | 256/322 | Cancer             | Control/Polyp | Additive  | 1.02 | 0.75, 1.38 | 0.907        | 0.99 |
|       |           |     | 338/322 | Adenoma/HGD/Cancer | Control/Polyp | Dominant  | 0.69 | 0.52, 0.92 | <b>0.011</b> | 0.5  |
|       |           |     | 338/322 | Adenoma/HGD/Cancer | Control/Polyp | Recessive | 1.70 | 0.70, 4.09 | 0.241        | 0.83 |

|      |            |     |         |                    |               |           |      |             |       |      |
|------|------------|-----|---------|--------------------|---------------|-----------|------|-------------|-------|------|
|      |            |     | 338/322 | Adenoma/HGD/Cancer | Control/Polyp | Additive  | 1.07 | 0.81, 1.42  | 0.621 | 0.92 |
|      |            |     | 338/213 | Adenoma/HGD/Cancer | Control       | Dominant  | 0.97 | 0.70, 1.35  | 0.872 | 0.99 |
|      |            |     | 338/213 | Adenoma/HGD/Cancer | Control       | Recessive | 0.63 | 0.37, 1.05  | 0.080 | 0.50 |
|      |            |     | 338/213 | Adenoma/HGD/Cancer | Control       | Additive  | 0.89 | 0.69, 1.14  | 0.357 | 0.89 |
|      |            |     | 96/213  | Adenoma/HGD        | Control       | Dominant  | 0.91 | 0.56, 1.47  | 0.701 | 0.94 |
|      |            |     | 96/213  | Adenoma/HGD        | Control       | Recessive | 0.68 | 0.31, 1.51  | 0.346 | 0.89 |
|      |            |     | 96/213  | Adenoma/HGD        | Control       | Additive  | 0.88 | 0.61, 1.25  | 0.471 | 0.89 |
|      |            |     | 96/322  | Adenoma/HGD        | Control/Polyp | Dominant  | 1.21 | 0.24, 0.75  | 0.431 | 0.89 |
|      |            |     | 96/322  | Adenoma/HGD        | Control/Polyp | Recessive | 1.71 | 0.50, 5.79  | 0.315 | 0.89 |
|      |            |     | 96/322  | Adenoma/HGD        | Control/Polyp | Additive  | 1.22 | 0.81, 1.84  | 0.336 | 0.89 |
| FRZB | rs17265803 | T>C | 209/215 | Polyp/Adenoma/HGD  | Control       | Dominant  | 0.81 | 0.49, 1.33  | 0.401 | 0.89 |
|      |            |     | 209/215 | Polyp/Adenoma/HGD  | Control       | Recessive | 0.00 | 0           | 0.999 | 1.00 |
|      |            |     | 209/215 | Polyp/Adenoma/HGD  | Control       | Additive  | 0.79 | 0.48, 1.24  | 0.346 | 0.89 |
|      |            |     | 248/215 | Cancer             | Control       | Dominant  | 1.13 | 0.72, 1.77  | 0.581 | 0.91 |
|      |            |     | 248/215 | Cancer             | Control       | Recessive | 0.87 | 0.05, 13.94 | 0.919 | 0.99 |
|      |            |     | 248/215 | Cancer             | Control       | Additive  | 1.12 | 0.73, 1.73  | 0.604 | 0.91 |
|      |            |     | 248/323 | Cancer             | Control/Polyp | Dominant  | 1.20 | 0.80, 1.81  | 0.370 | 0.89 |
|      |            |     | 248/323 | Cancer             | Control/Polyp | Recessive | 1.30 | 0.08, 20.95 | 0.852 | 0.99 |
|      |            |     | 248/323 | Cancer             | Control/Polyp | Additive  | 1.20 | 0.81, 1.78  | 0.369 | 0.89 |
|      |            |     | 355/323 | Adenoma/HGD/Cancer | Control/Polyp | Dominant  | 1.10 | 0.75, 1.60  | 0.634 | 0.92 |
|      |            |     | 355/323 | Adenoma/HGD/Cancer | Control/Polyp | Recessive | 0.94 | 0.06, 15.12 | 0.966 | 1.00 |
|      |            |     | 355/323 | Adenoma/HGD/Cancer | Control/Polyp | Additive  | 1.09 | 0.75, 1.58  | 0.645 | 0.94 |
|      |            |     | 355/215 | Adenoma/HGD/Cancer | Control       | Dominant  | 0.98 | 0.65, 1.47  | 0.931 | 0.99 |
|      |            |     | 355/215 | Adenoma/HGD/Cancer | Control       | Recessive | 0.48 | 0.03, 7.64  | 0.600 | 0.91 |
|      |            |     | 355/215 | Adenoma/HGD/Cancer | Control       | Additive  | 0.97 | 0.65, 1.42  | 0.876 | 0.99 |
|      |            |     | 99/215  | Adenoma/HGD        | Control       | Dominant  | 0.79 | 0.42, 1.48  | 0.457 | 0.89 |
|      |            |     | 99/215  | Adenoma/HGD        | Control       | Recessive | 0.00 | 0           | 0.999 | 1.00 |
|      |            |     | 99/215  | Adenoma/HGD        | Control       | Additive  | 0.77 | 0.42, 1.43  | 0.414 | 0.89 |
|      |            |     | 99/323  | Adenoma/HGD        | Control/Polyp | Dominant  | 0.84 | 0.46, 1.53  | 0.561 | 0.91 |
|      |            |     | 99/323  | Adenoma/HGD        | Control/Polyp | Recessive | 0.00 | 0           | 0.999 | 1.00 |

|        |             |               |          |      |            |       |      |
|--------|-------------|---------------|----------|------|------------|-------|------|
| 99/323 | Adenoma/HGD | Control/Polyp | Additive | 0.82 | 0.45, 1.49 | 0.524 | 0.89 |
|--------|-------------|---------------|----------|------|------------|-------|------|

Polyps were generally hyperplastic and less than 2mm, or 1 or 2 tubular adenomas <10mm.

Adenomas (advanced adenomas) were all >10mm, or at least 3 adenomas <10mm, and/or with villous or tubulovillous components.

Adenomas with high grade dysplasia (HGD) were advanced adenomas with at least 5% HGD.

SNP, Single Nucleotide Polymorphism; OR, Odd Ratio; CI, Confidence Interval; Ca/Co, Case/Control; HGD, High Grade Dysplasia.

\**p-value* obtained from logistic regression model (Additive, Dominant, Recessive) adjusted for age and sex; *p-value considered significant at < 0.05 and noted in bold.*

FDR- False Discovery Rate obtained by the Benjamini–Hochberg procedure.
