# Supplementary material for: The Associations of Selenoprotein Genetic Variants with the Risks of Colorectal Adenoma and Colorectal Cancer: Case–Control Studies in Irish and Czech Populations
Source: MDPI journal article supplement (doi:10.3390/nu14132718), 2022-06-29
Supplement: s1 [file s1]

**Table S1:** Allele frequencies for SNPs observed in both the Czech and Irish study populations.

| Republic of Ireland |            |                      |         |         |             | Czech Republic |            |                      |          |          |             |
|---------------------|------------|----------------------|---------|---------|-------------|----------------|------------|----------------------|----------|----------|-------------|
| Genes               | SNP        | Allele<br>1/Allele 2 | Cases   | Control | P-<br>Value | Genes          | SNP        | Allele<br>1/Allele 2 | Cases    | Control  | P-<br>Value |
| <i>GPX1</i>         | rs1050450  | T/C                  | 141/305 | 237/481 | 0.57        | <i>GPX1</i>    | rs9818758  | A/G                  | 239/1195 | 209/1045 | 0.92        |
| <i>GPX3</i>         | rs8177426  | A/G                  | 91/373  | 129/599 | 0.06        | <i>GPX4</i>    | rs2074451  | T/G                  | 632/792  | 540/706  | 0.87        |
| <i>GPX3</i>         | rs8177447  | T/C                  | 85/375  | 124/602 | 0.14        | <i>GPX5</i>    | rs445870   | G/A                  | 367/1047 | 346/908  | 0.30        |
| <i>GPX4</i>         | rs2074451  | T/G                  | 220/198 | 194/218 | 0.60        | <i>SELENOM</i> | rs11705137 | C/T                  | 620/798  | 564/670  | 1.00        |
| <i>GPX4</i>         | rs713041   | T/C                  | 203/233 | 304/374 | 0.03        | <i>SELENON</i> | rs4659382  | G/C                  | 300/1134 | 276/986  | 1.00        |
| <i>GPX5</i>         | rs445870   | G/A                  | 132/310 | 135/295 | 0.07        | <i>SELENON</i> | rs1124771  | G/C                  | 600/828  | 521/731  | 0.11        |
| <i>SELENOF</i>      | rs5859     | T/C                  | 117/339 | 140/596 | 0.69        | <i>SELENOV</i> | rs4802034  | T/C                  | 373/1049 | 316/930  | 0.05        |
| <i>SELENOM</i>      | rs11705137 | T/C                  | 215/207 | 203/215 | 1.00        | <i>SEPSH1</i>  | rs2275129  | C/G                  | 639/787  | 550/706  | 0.89        |
| <i>SELENON</i>      | rs4659382  | G/C                  | 105/337 | 86/342  | 0.60        | <i>TXNRD1</i>  | rs11111979 | C/G                  | 676/734  | 594/658  | 0.30        |
| <i>SELENON</i>      | rs1124771  | G/C                  | 189/219 | 185/241 | 0.10        | <i>TXNRD1</i>  | rs7953266  | C/T                  | 594/840  | 522/732  | 0.61        |
| <i>SELENOF</i>      | rs2972994  | A/G                  | 234/230 | 330/396 | 0.23        | <i>BAX</i>     | rs4645887  | A/T                  | 572/856  | 510/738  | 0.55        |
| <i>SELENOF</i>      | rs7579     | A/G                  | 122/330 | 176/552 | 0.71        | <i>FOXO3</i>   | rs3813498  | C/T                  | 263/1161 | 232/1022 | 0.15        |
| <i>SELENOS</i>      | rs34713741 | T/C                  | 115/341 | 199/525 | 0.93        | <i>FRZB</i>    | rs17265803 | T/C                  | 207/1221 | 160/1094 | 0.37        |
| <i>SEPSH1</i>       | rs2275129  | C/G                  | 187/199 | 204/228 | 0.60        |                |            |                      |          |          |             |
| <i>SOD2</i>         | rs4880     | T/C                  | 229/227 | 360/372 | 0.90        |                |            |                      |          |          |             |
| <i>TXNRD1</i>       | rs11111979 | C/G                  | 219/231 | 199/229 | 0.04        |                |            |                      |          |          |             |
| <i>TXNRD2</i>       | rs9605031  | T/C                  | 117/337 | 167/565 | 0.53        |                |            |                      |          |          |             |
| <i>BAX</i>          | rs4645887  | A/T                  | 167/273 | 173/249 | 0.62        |                |            |                      |          |          |             |
| <i>FOXO3</i>        | rs3813498  | C/T                  | 85/369  | 81/345  | 0.90        |                |            |                      |          |          |             |
| <i>FRZB</i>         | rs17265803 | C/T                  | 53/413  | 45/385  | 0.05        |                |            |                      |          |          |             |

p-value indicating the Hardy Weinberg Equilibrium significance > 0.05 for cases and controls combined  
 SNP-Single Nucleotide Polymorphism
